# Supplementary material for: Omega 3 fatty acids stimulate thermogenesis during torpor in the Arctic Ground Squirrel
Source: PubMed Central journal article supplement (PMC7809411; doi:10.1038/s41598-020-78763-8), 2021-01-14
Supplement: 41598_2020_78763_MOESM1_ESM.pdf [file 41598_2020_78763_MOESM1_ESM.pdf]

## **Supplemental Figures and Tables for Manuscript**

**Title: Omega 3 Fatty Acids Stimulate Thermogenesis During Torpor in the Arctic Ground Squirrel**

**Authors: Rice, SA<sup>1,2</sup>; Mikes, M<sup>2</sup>, Bibus, D<sup>3</sup>; Berdyshev, E<sup>4</sup>; Reisz, JA<sup>5</sup>; Gehrke, S<sup>5</sup>; Bronova, I<sup>4</sup>; D'Alessandro, A<sup>5</sup>; Drew, KL<sup>1,2\*</sup>**

<sup>1</sup>Department of Chemistry and Biochemistry, <sup>2</sup>Institute of Arctic Biology, Center of Transformative Research in Metabolism, University of Alaska Fairbanks, Fairbanks, AK, United States <sup>3</sup>Lipid Technologies, LLC, Austin, MN, United States <sup>4</sup>National Jewish Health, Denver, CO, United States <sup>5</sup>Department of Biochemistry and Molecular Genetics, University of Colorado Anschutz Medical Campus, Aurora, CO, United States

Corresponding author: [kdrew@alaska.edu](mailto:kdrew@alaska.edu)

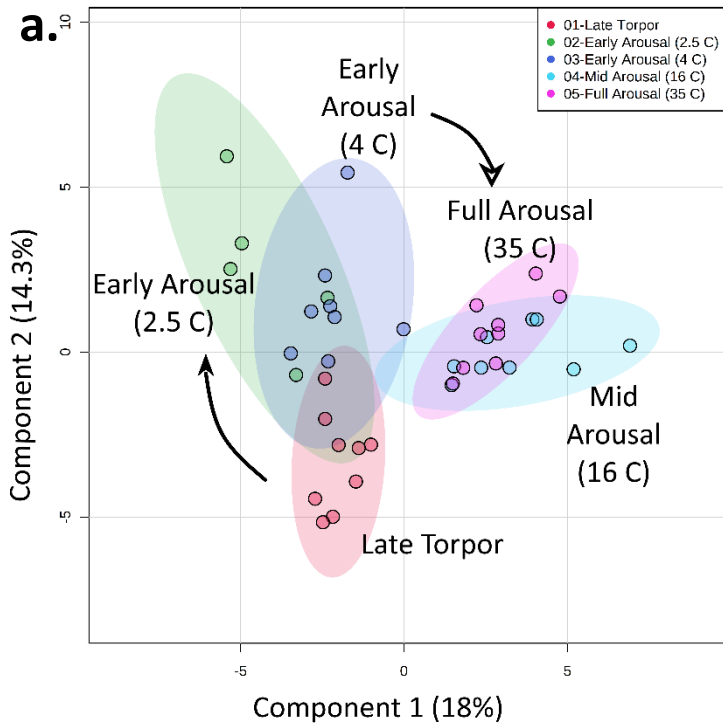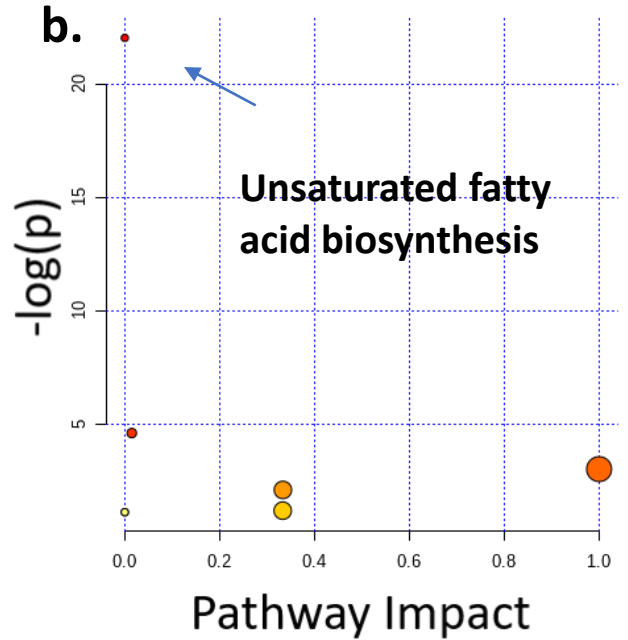

**Supplemental Figure 1. Plasma metabolomic analysis during natural arousal from torpor shows spike of PUFA metabolites during early arousal a.** Results indicate metabolite clustering based on phase of arousal from torpor using partial least-squares-discriminant analysis (PLS-DA). PLS-DA is a multivariate classification method that distinguishes differences between groups (specific phases of arousal). The dots are weighted averages of variables which describe the differences between groups. Results show phases of arousal cluster into unique, distinct lipid groups. **b.** Biosynthesis of unsaturated fatty acids dominate pathway analysis of plasma lipid profiling of natural arousal (utilizing  $p$  values  $<0.05$  from FDR corrected  $t$ -tests between early arousal  $4^{\circ}\text{C}$  and full arousal  $35^{\circ}\text{C}$ ). Pathway enrichment analysis, utilizing lipids which significantly change over arousal, indicates biosynthesis of PUFAs the most significant lipid metabolic change during arousal from torpor ( $p < 0.0001$ ,  $n=9$ ). The MetaboAnalyst visual representation of these significant changes come from combining significant  $p$  values from pathway enrichment analysis and pathway topology analysis. **c.** Measurements are from individual animals sampled over a single, undisturbed natural arousal fed Standard Rodent Chow. Blood was sampled at specific core body temperatures during arousal ranging from early arousal ( $2.5^{\circ}\text{C}$ ) to full arousal ( $35^{\circ}\text{C}$ ).

## Torpid Hypothalamic Fatty Acid Amides

| Fatty Acid Amides               | Diet                 | N | Mean (pmol/nmol lipid P) | Std. Error Mean | P value (FDR corrected) |
|---------------------------------|----------------------|---|--------------------------|-----------------|-------------------------|
| 14:0-NAE                        | Balanced Diet        | 8 | <b>1.42*</b>             | 0.31            | 0.008*                  |
|                                 | Standard Rodent Chow | 7 | 0.01                     | 0.01            |                         |
| 16:1-NAE                        | Balanced Diet        | 8 | 0.52                     | 0.15            | 0.574                   |
|                                 | Standard Rodent Chow | 7 | 0.28                     | 0.03            |                         |
| PEA (16:0-NAE)                  | Balanced Diet        | 8 | 12.82                    | 2.05            | 0.104                   |
|                                 | Standard Rodent Chow | 7 | 6.75                     | 0.86            |                         |
| linoleylethanolamide (18:2-NAE) | Balanced Diet        | 8 | 2.22                     | 2.05            | 0.602                   |
|                                 | Standard Rodent Chow | 7 | 0.09                     | 0.03            |                         |
| OEA (18:1-NAE)                  | Balanced Diet        | 8 | 9.78                     | 2.51            | 0.576                   |
|                                 | Standard Rodent Chow | 7 | 6.67                     | 0.77            |                         |
| Stearoylethanolamide (18:0-NAE) | Balanced Diet        | 8 | 7.68                     | 4.17            | 0.576                   |
|                                 | Standard Rodent Chow | 7 | 1.78                     | 0.29            |                         |
| AEA (20:4NAE)                   | Balanced Diet        | 8 | 0.12                     | 0.01            | 0.764                   |
|                                 | Standard Rodent Chow | 7 | 0.13                     | 0.04            |                         |
| 20:1-NAE                        | Balanced Diet        | 8 | 0.26                     | 0.07            | 0.749                   |
|                                 | Standard Rodent Chow | 7 | 0.22                     | 0.03            |                         |
| 20:0-NAE                        | Balanced Diet        | 8 | 0.50                     | 0.13            | 0.602                   |
|                                 | Standard Rodent Chow | 7 | 0.36                     | 0.06            |                         |
| Synaptamide (22:6-NAE)          | Balanced Diet        | 8 | 0.04                     | 0.01            | 0.963                   |
|                                 | Standard Rodent Chow | 7 | 0.05                     | 0.01            |                         |
| 22:1-NAE                        | Balanced Diet        | 8 | 0.12                     | 0.02            | 0.749                   |
|                                 | Standard Rodent Chow | 7 | 0.13                     | 0.02            |                         |
| 22:0-NAE                        | Balanced Diet        | 8 | <b>0.11*</b>             | 0.04            | 0.008*                  |
|                                 | Standard Rodent Chow | 7 | 0.66                     | 0.13            |                         |
| 24:0-NAE                        | Balanced Diet        | 8 | 0.10                     | 0.02            | 0.576                   |
|                                 | Standard Rodent Chow | 7 | 0.15                     | 0.04            |                         |
| 2-AG                            | Balanced Diet        | 8 | 509.78                   | 30.30           | 0.749                   |
|                                 | Standard Rodent Chow | 7 | 582.55                   | 156.90          |                         |

**Supplemental Table 1. Balanced Diet increases torpid hypothalamic 22:0 and 14:0 NAE the fatty acid amides, but does not influence bioactive NAEs and endocannabinoids compared to Standard Rodent Chow (two-tailed t-test, FDR corrected, n=7-8).**

## Interbout Arousal Hypothalamic Fatty Acid Amides

| Fatty Acid Amides                | Diet                 | N | Mean (pmol/nmol lipid P) | Std. Error Mean | P value (FDR corrected) |
|----------------------------------|----------------------|---|--------------------------|-----------------|-------------------------|
| 14:0-NAE                         | Balanced Diet        | 4 | 1.15                     | 0.30            | 0.185                   |
|                                  | Standard Rodent Chow | 4 | 0.09                     | 0.07            |                         |
| 16:1-NAE                         | Balanced Diet        | 4 | 0.35                     | 0.04            | 0.781                   |
|                                  | Standard Rodent Chow | 4 | 0.31                     | 0.04            |                         |
| PEA (16:0-NAE)                   | Balanced Diet        | 4 | 5.21                     | 0.80            | 0.384                   |
|                                  | Standard Rodent Chow | 4 | 3.01                     | 0.49            |                         |
| linoleoylethanolamide (18:2-NAE) | Balanced Diet        | 4 | 0.16                     | 0.11            | 0.781                   |
|                                  | Standard Rodent Chow | 4 | 0.40                     | 0.26            |                         |
| OEA (18:1-NAE)                   | Balanced Diet        | 4 | 7.70                     | 1.02            | 0.781                   |
|                                  | Standard Rodent Chow | 4 | 6.94                     | 0.98            |                         |
| Stearoylethanolamide (18:0-NAE)  | Balanced Diet        | 4 | 2.39                     | 0.73            | 0.831                   |
|                                  | Standard Rodent Chow | 4 | 1.93                     | 0.97            |                         |
| AEA (20:4NAE)                    | Balanced Diet        | 4 | 0.12                     | 0.03            | 0.781                   |
|                                  | Standard Rodent Chow | 4 | 0.14                     | 0.03            |                         |
| 20:1-NAE                         | Balanced Diet        | 4 | 0.23                     | 0.05            | 0.384                   |
|                                  | Standard Rodent Chow | 4 | 0.14                     | 0.03            |                         |
| 20:0-NAE                         | Balanced Diet        | 4 | 0.40                     | 0.08            | 0.384                   |
|                                  | Standard Rodent Chow | 4 | 0.22                     | 0.03            |                         |
| Synaptamide (22:6-NAE)           | Balanced Diet        | 4 | 0.03                     | 0.02            | 0.674                   |
|                                  | Standard Rodent Chow | 4 | 0.05                     | 0.01            |                         |
| 22:1-NAE                         | Balanced Diet        | 4 | 0.10                     | 0.03            | 0.384                   |
|                                  | Standard Rodent Chow | 4 | 0.05                     | 0.01            |                         |
| 22:0-NAE                         | Balanced Diet        | 4 | 0.60                     | 0.22            | 0.854                   |
|                                  | Standard Rodent Chow | 4 | 0.51                     | 0.23            |                         |
| 24:0-NAE                         | Balanced Diet        | 4 | 0.17                     | 0.09            | 0.781                   |
|                                  | Standard Rodent Chow | 4 | 0.10                     | 0.04            |                         |
| 2-AG                             | Balanced Diet        | 4 | 304.86                   | 59.90           | 0.939                   |
|                                  | Standard Rodent Chow | 4 | 310.09                   | 25.09           |                         |

**Supplemental Table 2.** Diet does not influence hypothalamic fatty acid amides or endocannabinoids during interbout arousal (two-tailed t-test, n=7-8, FDR corrected).

## Plasma Early Torpor Fatty Acids

| Fatty Acid                    | Diet                 | N | Mean (µg/ml) | Std. Error Mean |
|-------------------------------|----------------------|---|--------------|-----------------|
| Linoleic Acid (18:2ω6)        | Balanced Diet        | 4 | 4208.85      | 892.98          |
|                               | Standard Rodent Chow | 3 | 3164.77      | 109.92          |
| Alpha Linolenic Acid (18:3ω3) | Balanced Diet        | 4 | 400.06       | 105.07          |
|                               | Standard Rodent Chow | 3 | 148.92       | 25.81           |
| Arachidonic Acid (20:4ω6)     | Balanced Diet        | 4 | 485.06       | 20.95           |
|                               | Standard Rodent Chow | 3 | 383.96       | 49.36           |
| EPA (20:5ω3)                  | Balanced Diet        | 4 | 114.37       | 14.24           |
|                               | Standard Rodent Chow | 3 | 8.00         | 0.90            |
| DHA (22:6ω3)                  | Balanced Diet        | 4 | 581.25       | 73.45           |
|                               | Standard Rodent Chow | 3 | 80.53        | 17.54           |
| DPA ω6 (22:5 ω6)              | Balanced Diet        | 4 | 12.65        | 1.83            |
|                               | Standard Rodent Chow | 3 | 9.88         | 2.37            |

## Plasma Late Torpor Fatty Acids

| Fatty Acid                    | Diet                 | N | Mean (µg/ml) | Std. Error Mean |
|-------------------------------|----------------------|---|--------------|-----------------|
| Linoleic Acid (18:2ω6)        | Balanced Diet        | 4 | 3845.02      | 255.45          |
|                               | Standard Rodent Chow | 4 | 3894.54      | 57.42           |
| Alpha Linolenic Acid (18:3ω3) | Balanced Diet        | 4 | 210.20       | 39.19           |
|                               | Standard Rodent Chow | 4 | 147.38       | 20.13           |
| Arachidonic Acid (20:4ω6)     | Balanced Diet        | 4 | 497.30       | 57.59           |
|                               | Standard Rodent Chow | 4 | 488.27       | 31.33           |
| EPA (20:5ω3)                  | Balanced Diet        | 4 | 113.13       | 23.23           |
|                               | Standard Rodent Chow | 4 | 9.17         | 0.79            |
| DHA (22:6ω3)                  | Balanced Diet        | 4 | 493.59       | 65.00           |
|                               | Standard Rodent Chow | 4 | 112.40       | 12.01           |
| DPA ω6 (22:5 ω6)              | Balanced Diet        | 4 | 10.48        | 1.99            |
|                               | Standard Rodent Chow | 4 | 15.77        | 1.05            |

**Supplemental Table 3.** Data show exact free fatty acid values in plasma in late torpor and early torpor AGS. Values were not significantly different between late torpor and early torpor (FDR corrected t-test).

## WAT Early Torpor Fatty Acids

| Fatty Acid                    | Diet                 | N | Mean (µg/mg) | Std. Error Mean |
|-------------------------------|----------------------|---|--------------|-----------------|
| Linoleic Acid (18:2ω6)        | Balanced Diet        | 4 | 119,646      | 2075            |
|                               | Standard Rodent Chow | 3 | 213451       | 11491           |
| Alpha Linolenic Acid (18:3ω3) | Balanced Diet        | 4 | 66347        | 2249            |
|                               | Standard Rodent Chow | 3 | 40464        | 632             |
| Arachidonic Acid (20:4ω6)     | Balanced Diet        | 4 | 1128         | 61              |
|                               | Standard Rodent Chow | 3 | 1201         | 48              |
| EPA (20:5ω3)                  | Balanced Diet        | 4 | 1750         | 110             |
|                               | Standard Rodent Chow | 3 | 282          | 27              |
| DHA (22:6ω3)                  | Balanced Diet        | 4 | 3363         | 400             |
|                               | Standard Rodent Chow | 3 | 322          | 54              |
| DPA ω6 (22:5 ω6)              | Balanced Diet        | 4 | 151          | 22              |
|                               | Standard Rodent Chow | 3 | 70           | 13              |

## WAT Late Torpor Fatty Acids

| Fatty Acid                    | Diet                 | N | Mean (µg/mg) | Std. Error Mean |
|-------------------------------|----------------------|---|--------------|-----------------|
| Linoleic Acid (18:2ω6)        | Balanced Diet        | 4 | 121248       | 2560            |
|                               | Standard Rodent Chow | 4 | 212449       | 7844            |
| Alpha Linolenic Acid (18:3ω3) | Balanced Diet        | 4 | 65622        | 3098            |
|                               | Standard Rodent Chow | 4 | 41530        | 1139            |
| Arachidonic Acid (20:4ω6)     | Balanced Diet        | 4 | 1115         | 59              |
|                               | Standard Rodent Chow | 4 | 1571         | 95              |
| EPA (20:5ω3)                  | Balanced Diet        | 4 | 1747         | 102             |
|                               | Standard Rodent Chow | 4 | 369          | 26              |
| DHA (22:6ω3)                  | Balanced Diet        | 4 | 3255         | 251             |
|                               | Standard Rodent Chow | 4 | 426          | 132             |
| DPA ω6 (22:5 ω6)              | Balanced Diet        | 4 | 178          | 12              |
|                               | Standard Rodent Chow | 4 | 73           | 4               |

**Supplemental Table 4.** Data show exact free fatty acid values in WAT tissue in late torpor and early torpor AGS. Values were not significantly different between late torpor and early torpor (FDR corrected t-test).

## BAT Early Torpor Fatty Acids

| Fatty Acid                    | Diet                 | N | Mean (µg/mg) | Std. Error Mean |
|-------------------------------|----------------------|---|--------------|-----------------|
| Linoleic Acid (18:2ω6)        | Balanced Diet        | 4 | 188037       | 9249            |
|                               | Standard Rodent Chow | 3 | 275240       | 16270           |
| Alpha Linolenic Acid (18:3ω3) | Balanced Diet        | 4 | 44919        | 2413            |
|                               | Standard Rodent Chow | 3 | 29449        | 2455            |
| Arachidonic Acid (20:4ω6)     | Balanced Diet        | 4 | 11069        | 2812            |
|                               | Standard Rodent Chow | 3 | 10741        | 2660            |
| EPA (20:5ω3)                  | Balanced Diet        | 4 | 1963         | 411             |
|                               | Standard Rodent Chow | 3 | 378          | 51              |
| DHA (22:6ω3)                  | Balanced Diet        | 4 | 10204        | 2084            |
|                               | Standard Rodent Chow | 3 | 2424         | 761             |
| DPA ω6 (22:5 ω6)              | Balanced Diet        | 4 | 329          | 53              |
|                               | Standard Rodent Chow | 3 | 411          | 94              |

## BAT Late Torpor Fatty Acids

| Fatty Acid                    | Diet                 | N | Mean (µg/mg) | Std. Error Mean |
|-------------------------------|----------------------|---|--------------|-----------------|
| Linoleic Acid (18:2ω6)        | Balanced Diet        | 4 | 179801       | 2897            |
|                               | Standard Rodent Chow | 4 | 278031       | 9526            |
| Alpha Linolenic Acid (18:3ω3) | Balanced Diet        | 4 | 45503        | 1615            |
|                               | Standard Rodent Chow | 4 | 28030        | 984             |
| Arachidonic Acid (20:4ω6)     | Balanced Diet        | 4 | 8605         | 1245            |
|                               | Standard Rodent Chow | 4 | 12596        | 1538            |
| EPA (20:5ω3)                  | Balanced Diet        | 4 | 2037         | 491             |
|                               | Standard Rodent Chow | 4 | 492          | 20              |
| DHA (22:6ω3)                  | Balanced Diet        | 4 | 8434         | 1181            |
|                               | Standard Rodent Chow | 4 | 2845         | 235             |
| DPA ω6 (22:5 ω6)              | Balanced Diet        | 4 | 434          | 3               |
|                               | Standard Rodent Chow | 4 | 557          | 73              |

**Supplemental Table 5** Data show exact free fatty acid values in BAT tissue in late torpor and early torpor AGS. Values were not significantly different between late torpor and early torpor (FDR corrected t-test).

| Tissue | State   | Comparison | Metabolite                   | p value (FDR Corrected) |
|--------|---------|------------|------------------------------|-------------------------|
| BAT    | Torpor  | BD vs. SRC | w6/w3                        | 1.02E-07                |
| BAT    | Torpor  | BD vs. SRC | Linoleic Acid (182w6)        | 1.71E-06                |
| BAT    | Torpor  | BD vs. SRC | Alpha Linolenic Acid (183w3) | 3.20E-06                |
| BAT    | Torpor  | BD vs. SRC | DHA (226w3)                  | 0.000687                |
| BAT    | Torpor  | BD vs. SRC | EPA (205w3)                  | 0.001093                |
| BAT    | Torpor  | BD vs. SRC | ArachidonicAcid (204w6)      | 0.42154                 |
| BAT    | Torpor  | BD vs. SRC | DPA w6(225w6)                | 0.20025                 |
| BAT    | Arousal | BD vs. SRC | w6/w3                        | 0.000805                |
| BAT    | Arousal | BD vs. SRC | Linoleic Acid (182w6)        | 0.001998                |
| BAT    | Arousal | BD vs. SRC | Alpha Linolenic Acid (183w3) | 0.002854                |
| BAT    | Arousal | BD vs. SRC | Arachidonic Acid (204w6)     | 0.43768                 |
| BAT    | Arousal | BD vs. SRC | DHA (226w3)                  | 0.025898                |
| BAT    | Arousal | BD vs. SRC | DPA w6(225w6)                | 0.13869                 |
| BAT    | Arousal | BD vs. SRC | EPA (205w3)                  | 0.002854                |
| WAT    | Torpor  | BD vs. SRC | w6w3                         | 9.24E-13                |
| WAT    | Torpor  | BD vs. SRC | EPA (205w3)                  | 2.67E-09                |
| WAT    | Torpor  | BD vs. SRC | Linoleic Acid (182w6)        | 6.28E-09                |
| WAT    | Torpor  | BD vs. SRC | Alpha Linolenic Acid (183w3) | 7.63E-08                |
| WAT    | Torpor  | BD vs. SRC | DHA (226w3)                  | 1.10E-07                |
| WAT    | Torpor  | BD vs. SRC | DPA w6(225w6)                | 7.51E-05                |
| WAT    | Torpor  | BD vs. SRC | Arachidonic Acid (204w6)     | 0.024533                |
| WAT    | Arousal | BD vs. SRC | DHA (226w3)                  | 4.74E-07                |
| WAT    | Arousal | BD vs. SRC | EPA (205w3)                  | 0.000674                |
| WAT    | Arousal | BD vs. SRC | Alpha Linolenic Acid (183w3) | 0.001988                |
| WAT    | Arousal | BD vs. SRC | Linoleic Acid (182w6)        | 0.003411                |
| WAT    | Arousal | BD vs. SRC | Arachidonic Acid (204w6)     | 0.24198                 |
| WAT    | Arousal | BD vs. SRC | w6w3                         | 0.001456                |
| WAT    | Arousal | BD vs. SRC | Arachidonic Acid (204w6)     | 0.24198                 |
| Plasma | Torpor  | BD vs. SRC | w6w3                         | 1.00E-07                |
| Plasma | Torpor  | BD vs. SRC | DHA (226w3)                  | 1.98E-05                |
| Plasma | Torpor  | BD vs. SRC | EPA (205w3)                  | 2.49E-05                |
| Plasma | Torpor  | BD vs. SRC | Alpha Linolenic Acid (183w3) | 0.11531                 |
| Plasma | Torpor  | BD vs. SRC | ArachidonicAcid (204w6)      | 0.381                   |
| Plasma | Torpor  | BD vs. SRC | Linoleic Acid (182w6)        | 0.42336                 |
| Plasma | Torpor  | BD vs. SRC | DPA w6(225w6)                | 0.44594                 |
| Plasma | Arousal | BD vs. SRC | w6w3                         | 0.00221                 |
| Plasma | Arousal | BD vs. SRC | DHA (226w3)                  | 0.010501                |
| Plasma | Arousal | BD vs. SRC | EPA (205w3)                  | 0.011532                |
| Plasma | Arousal | BD vs. SRC | Alpha Linolenic Acid (183w3) | 0.17324                 |
| Plasma | Arousal | BD vs. SRC | DPA w6(225w6)                | 0.27087                 |
| Plasma | Arousal | BD vs. SRC | ArachidonicAcid (204w6)      | 0.39389                 |
| Plasma | Arousal | BD vs. SRC | Linoleic Acid (182w6)        | 0.40118                 |

**Supplemental Table 6.** P values for two-tailed t-tests of fatty acids (FDR corrected) comparing Balanced Diet (BD) to Standard Rodent Chow (SRC) for Fig. 1, Fig. 3 and Fig. 4.



| Fatty Acid | Balanced Diet Fatty Acid Percent | Standard Rodent Chow Fatty Acid Percent |
|------------|----------------------------------|-----------------------------------------|
| 10:0       | 0.00                             | 0.00                                    |
| 12:0       | 0.05                             | 0.03                                    |
| 14:0       | 0.75                             | 0.11                                    |
| 14:1       | 0.02                             | 0.00                                    |
| 15:0       | 0.01                             | 0.01                                    |
| 15:1       | 0.00                             | 0.00                                    |
| 16:0       | 13.99                            | 12.49                                   |
| 16:1w5     | 0.00                             | 0.00                                    |
| 16:1w7     | 1.19                             | 0.24                                    |
| 18:0       | 4.89                             | 3.44                                    |
| 18:1w9     | 24.67                            | 20.96                                   |
| 18:1w7     | 0.00                             | 0.00                                    |
| 18:1w5     | 0.00                             | 0.00                                    |
| 18:2w6     | 29.58                            | 50.50                                   |
| 18:3w6     | 0.03                             | 0.02                                    |
| 18:3w3     | 19.81                            | 10.04                                   |
| 18:4w3     | 0.09                             | 0.03                                    |
| 20:0       | 0.28                             | 0.28                                    |
| 20:1w7     | 0.01                             | 0.00                                    |
| 20:1w9     | 0.44                             | 0.27                                    |
| 20:2w6     | 0.16                             | 0.06                                    |
| 20:3w9     | 0.01                             | 0.00                                    |
| 20:3w6     | 0.03                             | 0.01                                    |
| 20:4w6     | 0.20                             | 0.02                                    |
| 20:3w3     | 0.05                             | 0.01                                    |
| 20:4w3     | 0.07                             | 0.01                                    |
| 20:5w3     | 0.69                             | 0.04                                    |
| 22:0       | 0.24                             | 0.35                                    |
| 22:1w9     | 0.03                             | 0.03                                    |
| 22:4w6     | 0.04                             | 0.04                                    |
| 22:5w6     | 0.04                             | 0.00                                    |
| 22:5w3     | 0.13                             | 0.00                                    |
| 24:0       | 0.03                             | 0.01                                    |
| 22:6w3     | 0.96                             | 0.11                                    |
| 24:1       | 0.04                             | 0.02                                    |
| other      | 1.44                             | 0.87                                    |
| sum        | 100.00                           | 100.00                                  |

**Supplemental Table 7. Fatty acid composition of Balanced Diet (Lab Diet, 9GU5) and Standard Rodent Chow (Mazuri, #5663).** Data shown are percent of total fatty acid
